# Supplementary material
Source: PubMed Central journal article supplement (PMC3113728)
Supplement: NIHMS296815-supplement-1_si_001.pdf [file NIHMS296815-supplement-1_si_001.pdf]

Supporting information

**Consensus 3D Model of  $\mu$ -Opioid Receptor Ligand Efficacy based on a Quantitative Conformationally Sampled Pharmacophore**

**Jihyun Shim, Andrew Coop and Alexander D. MacKerell, Jr.**

**Department of Pharmaceutical Sciences, School of Pharmacy, University of Maryland, Baltimore, Maryland 21201**

Table 1. Experimental data used in model construction and evaluation

| Training set    |                             | Test set                 |               |
|-----------------|-----------------------------|--------------------------|---------------|
| compounds       | % stimulation <sup>a)</sup> | Compounds                | % stimulation |
| Morphine        | 93 ± 2.8                    | Methadone                | 116 ±20       |
| Dihydromorphine | 109 ± 5                     | Etonitazene              | 119 ±19       |
| Normorphine     | 114 ±11                     | Fentanyl                 | 100 ±12       |
| Etorphine       | 117 ±24                     | (-)Ethylketozocine (EKC) | 146 ±85       |
| Buprenorphine   | 66 ±36                      | Funaltrexamine           | 19 ±0         |
| Nalrexone       | 0                           | (-)Cyclazocine           | 33 ±18        |
| Naloxone        | 0                           | (-)Pentazocine           | 35 ±4         |
| Nalmefene       | 0                           | (-)Bremazocine           | 0             |
| Nalorphine      | 0                           | DAMGO                    | 100           |
| Naltriben       | 0                           | PL017                    | 109 ±22       |
| Naltrindole     | 0                           | DSLET                    | 134 ± 65      |
| Diprenorphine   | 0                           | DADLE                    | 89 ± 15       |
|                 |                             | Leu-Enkephalin           | 11 ± 4        |

\* Lower limit (mean – standard deviation) of efficacies were used during model development.

a) Relative % stimulation with respect to that of DAMGO (100%) using a [<sup>35</sup>S]GTPγS binding assay

Table 2. Overlap coefficient used in the ABNS and AB'NS models

|                 | ABNS |      |      |      |      |      |      |      |      |      |      |      |      |      |      |      |      |      | efficacy |
|-----------------|------|------|------|------|------|------|------|------|------|------|------|------|------|------|------|------|------|------|----------|
|                 | AB   | AN   | AS   | BN   | BS   | NS   | ABN  | ABS  | ANB  | ANS  | ASB  | ASN  | BAN  | BAS  | BNS  | BSN  | NAS  | NBS  |          |
| morphine        | 1.00 | 1.00 | 1.00 | 1.00 | 1.00 | 1.00 | 1.00 | 1.00 | 1.00 | 1.00 | 1.00 | 1.00 | 1.00 | 1.00 | 1.00 | 1.00 | 1.00 | 1.00 | 0.90     |
| dihydromorphine | 0.20 | 0.82 | 0.87 | 0.32 | 0.32 | 0.99 | 0.23 | 0.27 | 0.52 | 0.96 | 0.57 | 0.97 | 0.26 | 0.31 | 0.30 | 0.33 | 0.95 | 0.31 | 1.04     |
| etorphine       | 0.50 | 0.52 | 0.55 | 0.24 | 0.24 | 0.98 | 0.53 | 0.46 | 0.24 | 0.71 | 0.23 | 0.72 | 0.24 | 0.24 | 0.33 | 0.41 | 0.63 | 0.25 | 0.93     |
| normorphine     | 0.97 | 0.86 | 0.22 | 0.97 | 0.00 | 0.00 | 0.93 | 0.77 | 0.95 | 0.37 | 0.48 | 0.20 | 0.93 | 0.41 | 0.62 | 0.33 | 0.03 | 0.36 | 1.03     |
| buprenorphine   | 0.50 | 0.41 | 0.03 | 0.16 | 0.00 | 0.00 | 0.49 | 0.85 | 0.20 | 0.32 | 0.01 | 0.10 | 0.19 | 0.24 | 0.17 | 0.27 | 0.30 | 0.16 | 0.30     |
| naloxone        | 0.25 | 0.85 | 0.05 | 0.21 | 0.05 | 0.00 | 0.22 | 0.55 | 0.73 | 0.23 | 0.30 | 0.10 | 0.31 | 0.28 | 0.29 | 0.30 | 0.41 | 0.34 | 0.00     |
| naltrexone      | 0.25 | 0.88 | 0.01 | 0.21 | 0.02 | 0.00 | 0.23 | 0.65 | 0.74 | 0.23 | 0.17 | 0.05 | 0.31 | 0.28 | 0.28 | 0.32 | 0.35 | 0.32 | 0.00     |
| nalmefene       | 0.50 | 0.91 | 0.01 | 0.44 | 0.09 | 0.00 | 0.55 | 0.63 | 0.83 | 0.22 | 0.16 | 0.06 | 0.57 | 0.45 | 0.30 | 0.32 | 0.36 | 0.33 | 0.00     |
| nalorphine      | 0.98 | 0.96 | 0.05 | 0.92 | 0.26 | 0.00 | 0.96 | 0.55 | 0.97 | 0.22 | 0.18 | 0.11 | 0.95 | 0.54 | 0.32 | 0.27 | 0.43 | 0.41 | 0.00     |
| naltrindole     | 0.00 | 0.21 | 0.43 | 0.00 | 0.00 | 0.00 | 0.00 | 0.00 | 0.76 | 0.35 | 0.48 | 0.11 | 0.00 | 0.00 | 0.26 | 0.24 | 0.16 | 0.54 | 0.00     |
| naltriben       | 0.00 | 0.30 | 0.36 | 0.00 | 0.00 | 0.00 | 0.00 | 0.00 | 0.32 | 0.32 | 0.84 | 0.11 | 0.00 | 0.00 | 0.33 | 0.30 | 0.19 | 0.59 | 0.00     |
| diprenorphine   | 0.52 | 0.41 | 0.02 | 0.16 | 0.00 | 0.00 | 0.48 | 0.83 | 0.20 | 0.28 | 0.01 | 0.08 | 0.20 | 0.24 | 0.19 | 0.28 | 0.35 | 0.20 | 0.00     |
| cyclazocine     | 0.75 | 0.84 | 0.03 | 0.75 | 0.21 | 0.00 | 0.77 | 0.43 | 0.66 | 0.27 | 0.22 | 0.09 | 0.73 | 0.48 | 0.31 | 0.26 | 0.33 | 0.35 | 0.15     |
| pentazocine     | 0.75 | 0.84 | 0.03 | 0.75 | 0.17 | 0.00 | 0.77 | 0.46 | 0.66 | 0.34 | 0.14 | 0.10 | 0.73 | 0.48 | 0.28 | 0.32 | 0.22 | 0.29 | 0.31     |
| EKC             | 0.01 | 0.78 | 0.11 | 0.22 | 0.00 | 0.00 | 0.02 | 0.40 | 0.04 | 0.26 | 0.71 | 0.06 | 0.08 | 0.25 | 0.66 | 0.40 | 0.29 | 0.52 | 0.61     |
| bremazocine     | 0.00 | 0.79 | 0.03 | 0.01 | 0.35 | 0.00 | 0.05 | 0.75 | 0.00 | 0.48 | 0.26 | 0.12 | 0.00 | 0.07 | 0.32 | 0.59 | 0.14 | 0.03 | 0.00     |
| etonitazene     | 0.00 | 0.20 | 0.26 | 0.00 | 0.02 | 0.01 | 0.12 | 0.17 | 0.09 | 0.53 | 0.04 | 0.52 | 0.36 | 0.34 | 0.41 | 0.44 | 0.16 | 0.10 | 1.00     |
| methadone       | 0.01 | 0.50 | 0.57 | 0.01 | 0.06 | 0.00 | 0.02 | 0.07 | 0.54 | 0.33 | 0.56 | 0.39 | 0.08 | 0.16 | 0.18 | 0.23 | 0.03 | 0.25 | 0.96     |
| fentanyl        | 0.46 | 0.03 | 0.00 | 0.00 | 0.00 | 0.00 | 0.22 | 0.41 | 0.04 | 0.04 | 0.00 | 0.01 | 0.01 | 0.03 | 0.21 | 0.11 | 0.30 | 0.44 | 0.88     |
| funaltrexamine  | 0.00 | 0.50 | 0.32 | 0.00 | 0.00 | 0.00 | 0.00 | 0.00 | 0.24 | 0.30 | 0.12 | 0.09 | 0.16 | 0.12 | 0.45 | 0.39 | 0.24 | 0.63 | 0.19     |
| DAMGO           | 0.00 | 0.17 | 0.32 | 0.00 | 0.00 | 0.00 | 0.00 | 0.00 | 0.08 | 0.27 | 0.06 | 0.25 | 0.18 | 0.27 | 0.20 | 0.12 | 0.25 | 0.04 | 1.00     |

|                |      |      |      |      |      |      |      |      |      |      |      |      |      |      |      |      |      |      |      |
|----------------|------|------|------|------|------|------|------|------|------|------|------|------|------|------|------|------|------|------|------|
| DSLET          | 0.00 | 0.24 | 0.32 | 0.00 | 0.00 | 0.00 | 0.00 | 0.00 | 0.08 | 0.26 | 0.05 | 0.26 | 0.17 | 0.26 | 0.18 | 0.13 | 0.23 | 0.06 | 0.69 |
| DADLE          | 0.00 | 0.23 | 0.32 | 0.00 | 0.00 | 0.00 | 0.00 | 0.00 | 0.11 | 0.29 | 0.07 | 0.28 | 0.16 | 0.26 | 0.20 | 0.12 | 0.25 | 0.04 | 0.74 |
| PL107          | 0.00 | 0.42 | 0.38 | 0.00 | 0.01 | 0.00 | 0.00 | 0.00 | 0.04 | 0.27 | 0.02 | 0.29 | 0.26 | 0.31 | 0.21 | 0.16 | 0.12 | 0.06 | 0.87 |
| Leu-Enkephalin | 0.00 | 0.29 | 0.35 | 0.00 | 0.00 | 0.00 | 0.00 | 0.00 | 0.06 | 0.28 | 0.04 | 0.28 | 0.19 | 0.28 | 0.19 | 0.14 | 0.19 | 0.09 | 0.07 |

AB'NS

|                 | AB   | AN   | AS   | BN   | BS   | NS   | ABN  | ABS  | ANB  | ANS  | ASB  | ASN  | BAN  | BAS  | BNS  | BSN  | NAS  | NBS  | efficacy |
|-----------------|------|------|------|------|------|------|------|------|------|------|------|------|------|------|------|------|------|------|----------|
| morphine        | 0.00 | 0.51 | 0.55 | 0.00 | 0.01 | 0.98 | 0.00 | 0.00 | 0.00 | 0.71 | 0.00 | 0.73 | 0.06 | 0.19 | 0.10 | 0.03 | 0.64 | 0.44 | 0.90     |
| dihydromorphine | 0.00 | 0.39 | 0.44 | 0.00 | 0.01 | 0.97 | 0.00 | 0.00 | 0.00 | 0.70 | 0.00 | 0.73 | 0.04 | 0.10 | 0.07 | 0.03 | 0.58 | 0.24 | 1.04     |
| etorphine       | 1.00 | 1.00 | 1.00 | 1.00 | 1.00 | 1.00 | 1.00 | 1.00 | 1.00 | 1.00 | 1.00 | 1.00 | 1.00 | 1.00 | 1.00 | 1.00 | 1.00 | 1.00 | 0.93     |
| normorphine     | 0.00 | 0.39 | 0.05 | 0.00 | 0.00 | 0.00 | 0.00 | 0.00 | 0.00 | 0.20 | 0.00 | 0.10 | 0.06 | 0.35 | 0.28 | 0.22 | 0.04 | 0.78 | 1.03     |
| buprenorphine   | 0.29 | 0.78 | 0.00 | 0.43 | 0.35 | 0.00 | 0.03 | 0.01 | 0.04 | 0.37 | 0.02 | 0.14 | 0.05 | 0.10 | 0.59 | 0.78 | 0.24 | 0.05 | 0.30     |
| naloxone        | 0.00 | 0.39 | 0.08 | 0.00 | 0.41 | 0.00 | 0.00 | 0.00 | 0.00 | 0.28 | 0.00 | 0.13 | 0.03 | 0.07 | 0.38 | 0.12 | 0.33 | 0.34 | 0.00     |
| naltrexone      | 0.00 | 0.41 | 0.02 | 0.00 | 0.54 | 0.00 | 0.00 | 0.00 | 0.00 | 0.29 | 0.00 | 0.08 | 0.03 | 0.07 | 0.45 | 0.10 | 0.28 | 0.30 | 0.00     |
| nalmefene       | 0.00 | 0.51 | 0.02 | 0.00 | 0.47 | 0.00 | 0.00 | 0.00 | 0.00 | 0.27 | 0.00 | 0.09 | 0.04 | 0.25 | 0.45 | 0.14 | 0.29 | 0.30 | 0.00     |
| nalorphine      | 0.00 | 0.53 | 0.07 | 0.00 | 0.21 | 0.00 | 0.00 | 0.00 | 0.00 | 0.27 | 0.00 | 0.13 | 0.05 | 0.32 | 0.38 | 0.16 | 0.36 | 0.35 | 0.00     |
| naltrindole     | 0.00 | 0.12 | 0.45 | 0.01 | 0.00 | 0.00 | 0.10 | 0.67 | 0.00 | 0.38 | 0.00 | 0.15 | 0.00 | 0.00 | 0.46 | 0.43 | 0.11 | 0.32 | 0.00     |
| naltriben       | 0.00 | 0.21 | 0.39 | 0.01 | 0.01 | 0.00 | 0.10 | 0.62 | 0.00 | 0.33 | 0.00 | 0.14 | 0.00 | 0.01 | 0.48 | 0.44 | 0.15 | 0.39 | 0.00     |
| diprenorphine   | 0.00 | 0.80 | 0.00 | 0.04 | 0.52 | 0.00 | 0.00 | 0.00 | 0.03 | 0.33 | 0.01 | 0.13 | 0.31 | 0.40 | 0.54 | 0.77 | 0.28 | 0.01 | 0.00     |
| cyclazocine     | 0.00 | 0.40 | 0.03 | 0.00 | 0.07 | 0.00 | 0.00 | 0.00 | 0.00 | 0.34 | 0.00 | 0.13 | 0.06 | 0.41 | 0.34 | 0.19 | 0.26 | 0.34 | 0.15     |
| pentazocine     | 0.00 | 0.39 | 0.03 | 0.00 | 0.16 | 0.00 | 0.00 | 0.00 | 0.00 | 0.37 | 0.00 | 0.14 | 0.06 | 0.39 | 0.33 | 0.19 | 0.18 | 0.27 | 0.31     |
| EKC             | 0.00 | 0.38 | 0.12 | 0.00 | 0.47 | 0.00 | 0.00 | 0.00 | 0.00 | 0.33 | 0.00 | 0.09 | 0.02 | 0.03 | 0.11 | 0.02 | 0.22 | 0.30 | 0.61     |

|                |      |      |      |      |      |      |      |      |      |      |      |      |      |      |      |      |      |      |      |
|----------------|------|------|------|------|------|------|------|------|------|------|------|------|------|------|------|------|------|------|------|
| bremazocine    | 0.00 | 0.35 | 0.05 | 0.00 | 0.01 | 0.00 | 0.00 | 0.00 | 0.02 | 0.59 | 0.00 | 0.19 | 0.09 | 0.64 | 0.53 | 0.09 | 0.11 | 0.02 | 0.00 |
| etonitazene    | 0.00 | 0.16 | 0.20 | 0.43 | 0.59 | 0.01 | 0.04 | 0.33 | 0.02 | 0.48 | 0.03 | 0.43 | 0.08 | 0.24 | 0.21 | 0.22 | 0.18 | 0.10 | 1.00 |
| methadone      | 0.00 | 0.35 | 0.34 | 0.62 | 0.64 | 0.00 | 0.02 | 0.07 | 0.00 | 0.35 | 0.01 | 0.38 | 0.04 | 0.11 | 0.07 | 0.07 | 0.04 | 0.21 | 0.96 |
| fentanyl       | 0.08 | 0.02 | 0.32 | 0.37 | 0.11 | 0.00 | 0.07 | 0.03 | 0.04 | 0.08 | 0.00 | 0.06 | 0.03 | 0.00 | 0.12 | 0.09 | 0.01 | 0.55 | 0.88 |
| funaltrexamine | 0.03 | 0.40 | 0.33 | 0.10 | 0.03 | 0.00 | 0.51 | 0.28 | 0.01 | 0.34 | 0.00 | 0.12 | 0.02 | 0.02 | 0.49 | 0.36 | 0.19 | 0.48 | 0.19 |
| DAMGO          | 0.11 | 0.16 | 0.25 | 0.03 | 0.07 | 0.00 | 0.19 | 0.07 | 0.28 | 0.23 | 0.23 | 0.21 | 0.23 | 0.30 | 0.29 | 0.26 | 0.28 | 0.04 | 1.00 |
| DSLET          | 0.13 | 0.20 | 0.20 | 0.05 | 0.12 | 0.00 | 0.15 | 0.06 | 0.24 | 0.24 | 0.23 | 0.23 | 0.22 | 0.27 | 0.25 | 0.22 | 0.28 | 0.06 | 0.69 |
| DADLE          | 0.11 | 0.22 | 0.25 | 0.03 | 0.07 | 0.00 | 0.20 | 0.05 | 0.22 | 0.26 | 0.23 | 0.24 | 0.18 | 0.24 | 0.30 | 0.27 | 0.28 | 0.04 | 0.74 |
| PL107          | 0.15 | 0.28 | 0.21 | 0.08 | 0.14 | 0.00 | 0.28 | 0.10 | 0.39 | 0.27 | 0.25 | 0.28 | 0.28 | 0.39 | 0.25 | 0.23 | 0.19 | 0.06 | 0.87 |
| Leu-Enkephalin | 0.19 | 0.24 | 0.23 | 0.07 | 0.19 | 0.00 | 0.25 | 0.13 | 0.25 | 0.26 | 0.22 | 0.25 | 0.23 | 0.28 | 0.24 | 0.23 | 0.24 | 0.08 | 0.07 |

Table 3. Top 10 ABNS regression models for efficacy

| no. | a     | X <sub>1</sub> | b     | X <sub>2</sub> | c     | X <sub>3</sub> | d     | R <sup>2</sup> | Q <sup>2</sup> | P-value | Cor (X <sub>1</sub> ,X <sub>2</sub> ) | Cor (X <sub>1</sub> ,X <sub>3</sub> ) | Cor (X <sub>2</sub> ,X <sub>3</sub> ) |
|-----|-------|----------------|-------|----------------|-------|----------------|-------|----------------|----------------|---------|---------------------------------------|---------------------------------------|---------------------------------------|
| 1   | 1.10  | AS             | 2.09  | BNS            | -2.43 | NBS            | 0.23  | 0.9602         | 0.95           | 0.00001 | 0.61                                  | 0.62                                  | 0.81                                  |
| 2   | -1.73 | BS             | 2.48  | ANS            | 0.89  | BAN            | -0.80 | 0.9342         | 0.89           | 0.00004 | 0.78                                  | 0.57                                  | 0.18                                  |
| 3   | 0.82  | BN             | -1.54 | BS             | 2.24  | ANS            | -0.68 | 0.929          | 0.90           | 0.00006 | 0.60                                  | 0.28                                  | 0.78                                  |
| 4   | 0.80  | AB             | -1.46 | BS             | 2.30  | ANS            | -0.78 | 0.9286         | 0.94           | 0.00006 | 0.50                                  | 0.17                                  | 0.78                                  |
| 5   | 0.42  | ABS            | 2.22  | ASN            | -1.70 | NAS            | 0.18  | 0.928          | 0.95           | 0.00006 | 0.09                                  | 0.21                                  | 0.88                                  |
| 6   | -1.46 | BS             | 0.81  | ABN            | 2.26  | ANS            | -0.77 | 0.9253         | 0.93           | 0.00007 | 0.53                                  | 0.78                                  | 0.20                                  |
| 7   | 0.46  | AN             | 2.22  | ASN            | -1.79 | NAS            | 0.14  | 0.9123         | 0.72           | 0.00014 | 0.27                                  | 0.42                                  | 0.88                                  |
| 8   | 0.73  | BN             | -1.49 | BS             | 1.75  | ASN            | -0.21 | 0.9101         | 0.58           | 0.00015 | 0.60                                  | 0.32                                  | 0.80                                  |
| 9   | 0.70  | AB             | -1.41 | BS             | 1.78  | ASN            | -0.29 | 0.9075         | 0.73           | 0.00017 | 0.50                                  | 0.21                                  | 0.80                                  |
| 10  | 0.31  | AB             | 2.00  | ASN            | -1.44 | NAS            | 0.22  | 0.9068         | 0.91           | 0.00018 | 0.21                                  | 0.19                                  | 0.88                                  |

Efficacy = aX<sub>1</sub> + bX<sub>2</sub> + cX<sub>3</sub> + d where X<sub>1</sub>, X<sub>2</sub> and X<sub>3</sub> represent the OC of combinations of pharmacophoric points used in the models.

Table 4. Top 10 AB'NS regression models for efficacy based on the use of the C19 substituent (B') as the B pharmacophoric point for the oripavines.

| no | a     | X <sub>1</sub> | b     | X <sub>2</sub> | c     | X <sub>3</sub> | d    | R <sup>2</sup> | Q <sup>2</sup> | P value | Cor (X <sub>1</sub> ,X <sub>2</sub> ) | Cor (X <sub>1</sub> ,X <sub>3</sub> ) | Cor (X <sub>2</sub> ,X <sub>3</sub> ) |
|----|-------|----------------|-------|----------------|-------|----------------|------|----------------|----------------|---------|---------------------------------------|---------------------------------------|---------------------------------------|
| 1  | 1.86  | BN             | -2.51 | BNS            | 0.62  | NBS            | 0.97 | 0.8739         | 0.95           | 0.00059 | 0.81                                  | 0.51                                  | 0.32                                  |
| 2  | 3.34  | AB             | -3.39 | BNS            | -0.84 | NAS            | 1.76 | 0.8728         | 0.59           | 0.00061 | 0.80                                  | 0.71                                  | 0.28                                  |
| 3  | -1.97 | BS             | -1.37 | ABS            | 3.38  | ANB            | 0.89 | 0.8670         | 0.79           | 0.00073 | 0.27                                  | 0.72                                  | 0.71                                  |
| 4  | -1.92 | BS             | 3.93  | ABN            | -1.97 | ABS            | 0.89 | 0.8634         | 0.90           | 0.00081 | 0.27                                  | 0.71                                  | 0.71                                  |
| 5  | 1.80  | NS             | 1.01  | BAS            | -2.40 | NAS            | 0.53 | 0.8617         | 0.85           | 0.00085 | 0.66                                  | 0.27                                  | 0.80                                  |
| 6  | 1.78  | BN             | 0.72  | BAS            | -2.74 | BNS            | 1.14 | 0.8604         | 0.92           | 0.00088 | 0.43                                  | 0.87                                  | 0.67                                  |
| 7  | 1.98  | AB             | -2.47 | BNS            | 0.40  | NBS            | 1.05 | 0.8505         | 0.77           | 0.00115 | 0.78                                  | 0.81                                  | 0.64                                  |
| 8  | 1.92  | AB             | 0.53  | BAS            | -2.65 | BNS            | 1.16 | 0.8445         | 0.84           | 0.00135 | 0.80                                  | 0.59                                  | 0.32                                  |
| 9  | 2.26  | AB             | -3.16 | BNS            | 0.47  | BSN            | 1.30 | 0.8434         | 0.74           | 0.00139 | 0.82                                  | 0.80                                  | 0.64                                  |
| 10 | 1.68  | BN             | 0.83  | BAN            | -2.84 | BNS            | 1.26 | 0.8330         | 0.87           | 0.00178 | 0.88                                  | 0.81                                  | 0.76                                  |

Efficacy = aX<sub>1</sub> + bX<sub>2</sub> + cX<sub>3</sub> + d where X<sub>1</sub>, X<sub>2</sub> and X<sub>3</sub> represent the OC of combinations of pharmacophoric points used in the models.

Table 5. RMSD of the training set with the ABNS and AB'NS models

|       | 1    | 2    | 3    | 4    | 5    | 6    | 7    | 8    | 9    | 10   | avg  |
|-------|------|------|------|------|------|------|------|------|------|------|------|
| ABNS  | 0.09 | 0.12 | 0.12 | 0.12 | 0.12 | 0.12 | 0.13 | 0.14 | 0.14 | 0.14 | 0.08 |
| AB'NS | 0.16 | 0.16 | 0.16 | 0.17 | 0.17 | 0.17 | 0.18 | 0.18 | 0.18 | 0.18 | 0.14 |

Table 6. Predicted efficacies of fentanyl and methadone in test set 1 using ABNS and AB'NS models. Pharmacophoric point definitions are illustrated in Figure S3.

|           |            | ABNS | AB'NS |
|-----------|------------|------|-------|
| fentanyl  | definition |      |       |
|           | 1          | -0.3 | 1.3   |
|           | 2          | -0.1 | 1.2   |
|           | 3          | 0.1  | 1.4   |
| methadone | 1          | 0.5  | 1.1   |
|           | 2          | 0.6  | -0.1  |



Table 7. Comparison between experimental and average calculated values by the ABNS and AB'NS models of the test molecules

(Figure 1). Numbers in parenthesis are differences from experimental values.

| comp.          | expt. | ABNS          | AB'NS        | comp.          | expt. | ABNS         | AB'NS        |
|----------------|-------|---------------|--------------|----------------|-------|--------------|--------------|
| cyclazocine    | 0.15  | 0.13 (-0.02)  | 0.50 (0.35)  | DAMGO          | 1     | 0.19 (-0.81) | 0.85 (-0.15) |
| pentazocine    | 0.31  | 0.30 (-0.01)  | 0.47 (0.16)  | DSLET          | 0.69  | 0.19 (-0.50) | 0.87 (0.18)  |
| EKC            | 0.61  | 0.00 (-0.61)  | 0.58 (-0.04) | DADLE          | 0.74  | 0.24 (-0.50) | 0.81 (0.07)  |
| bremazocine    | 0.00  | 0.04 (0.04)   | 0.27 (0.27)  | PL107          | 0.87  | 0.31 (-0.56) | 1.05 (0.18)  |
| etonitazene    | 1.00  | 0.78 (-0.23)  | 0.41 (-0.59) | Leu-Enkephalin | 0.07  | 0.25 (0.18)  | 0.95 (0.88)  |
| methadone      | 0.96  | 0.53 (-0.43)  | 1.07 (-0.11) |                |       |              |              |
| fentanyl       | 0.88  | -0.31 (-1.19) | 1.18 (0.30)  |                |       |              |              |
| funaltrexamine | 0.19  | -0.02 (-0.21) | 0.36 (0.17)  |                |       |              |              |

  

| Root mean square deviation (RMSD) of top 10 models |      |      |      |      |      |      |      |      |      |      |      |
|----------------------------------------------------|------|------|------|------|------|------|------|------|------|------|------|
|                                                    | 1    | 2    | 3    | 4    | 5    | 6    | 7    | 8    | 9    | 10   | avg  |
| ABNS                                               | 0.37 | 0.52 | 0.54 | 0.56 | 0.34 | 0.57 | 0.36 | 0.39 | 0.41 | 0.31 | 0.39 |
| AB'NS                                              | 0.38 | 0.38 | 0.64 | 0.59 | 0.75 | 0.40 | 0.37 | 0.26 | 0.27 | 0.28 | 0.26 |

Table 8. Antinociceptive potencies (ED<sub>50</sub> in mg/kg) in mouse

|              |               | tail-flicking assay                                                           | writhing assay                                                                | hot plate assay     | relative % stimulation         | AB'NS |
|--------------|---------------|-------------------------------------------------------------------------------|-------------------------------------------------------------------------------|---------------------|--------------------------------|-------|
| training set | morphine      | 3.00 <sup>a</sup> / 1.25 <sup>b</sup> / 3.80 <sup>c</sup> / 5.80 <sup>d</sup> | 0.60 <sup>e</sup> / 0.28 <sup>f</sup> / 0.43 <sup>a</sup> / 0.23 <sup>d</sup> | 0.80 <sup>d</sup>   | 0.93±0.03                      | 1.0   |
|              | etorphine     | 0.0006 <sup>b</sup>                                                           | 0.0009 <sup>f</sup>                                                           |                     | 1.17±0.24                      | 0.9   |
|              | buprenorphine | 2.40 <sup>c</sup>                                                             | 0.02 <sup>f</sup>                                                             |                     | 0.66±0.36                      | 0.3   |
| test set 1   | fentanyl      | 0.013 <sup>b</sup>                                                            |                                                                               |                     | 1.00±0.12                      | 1.2   |
|              | cyclazocine   |                                                                               | 0.10 <sup>f</sup>                                                             |                     | 0.33±0.18                      | 0.5   |
|              | pentazocine   | inactive <sup>c</sup>                                                         | 1.20 <sup>d</sup> / 0.80 <sup>f</sup>                                         |                     | 0.35±0.04 (0.04 <sup>d</sup> ) | 0.5   |
| test set 2   | 1             | 3.86 <sup>d</sup>                                                             | 0.39 <sup>d</sup>                                                             | 2.42 <sup>d</sup>   | 0.52 <sup>d</sup>              | 1.8   |
|              | 2             | 0.6383 <sup>a</sup>                                                           | 0.1014 <sup>a</sup>                                                           |                     |                                | 1.9   |
|              | 3             | 0.0001 <sup>d</sup>                                                           | 0.0002 <sup>d</sup>                                                           | 0.0001 <sup>d</sup> | 1.04 <sup>d</sup>              | 0.4   |
|              | 4             | 0.0032 <sup>d</sup>                                                           | 0.0062 <sup>d</sup>                                                           | 0.0023 <sup>d</sup> |                                | 1.0   |
|              | 5             |                                                                               |                                                                               | 1.18 <sup>i</sup>   | 0.78±0.05 <sup>h</sup>         | 0.8   |
|              | 6             | 0.11 <sup>g</sup>                                                             |                                                                               |                     | 0.79±0.01 <sup>h</sup>         | 2.1   |
|              | 7             |                                                                               | 0.8028 <sup>e</sup>                                                           |                     |                                | 0.4   |

\* Experimental values from different publications are indicated by slash separator. Units in original papers were converted to mg/kg.

\* Values in parenthesis are those found from other literatures. .

\* Relative % stimulation is based on DAMGO's efficacy 1.00 (100%)

a. reference 1, b. reference 2, c. reference 3 d. reference 4, e. reference 5, f. reference 6, g. reference 7, h.

reference 8, i. reference 9

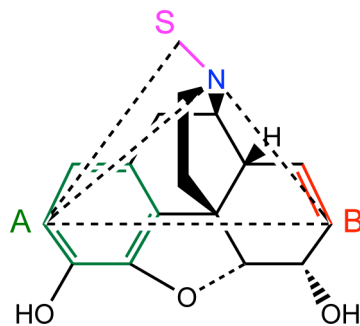

Figure 1. Pharmacophoric points used in CSP model development, from which six distances (AB, AN, AS, BN, BS, NS) and twelve angles (ABN, ABS, ANB, ANS, ASB, ASN, BAN, BAS, BNS, BSN, NAS, NBS) were derived and considered in model development. For the pharmacophoric points A and B, the definitions were based on the atoms yielding the maximum distance between A and B, pharmacophoric point N was simply the geometric position of the basic nitrogen, and definition of S was based on the geometric center of the atoms comprising that group.

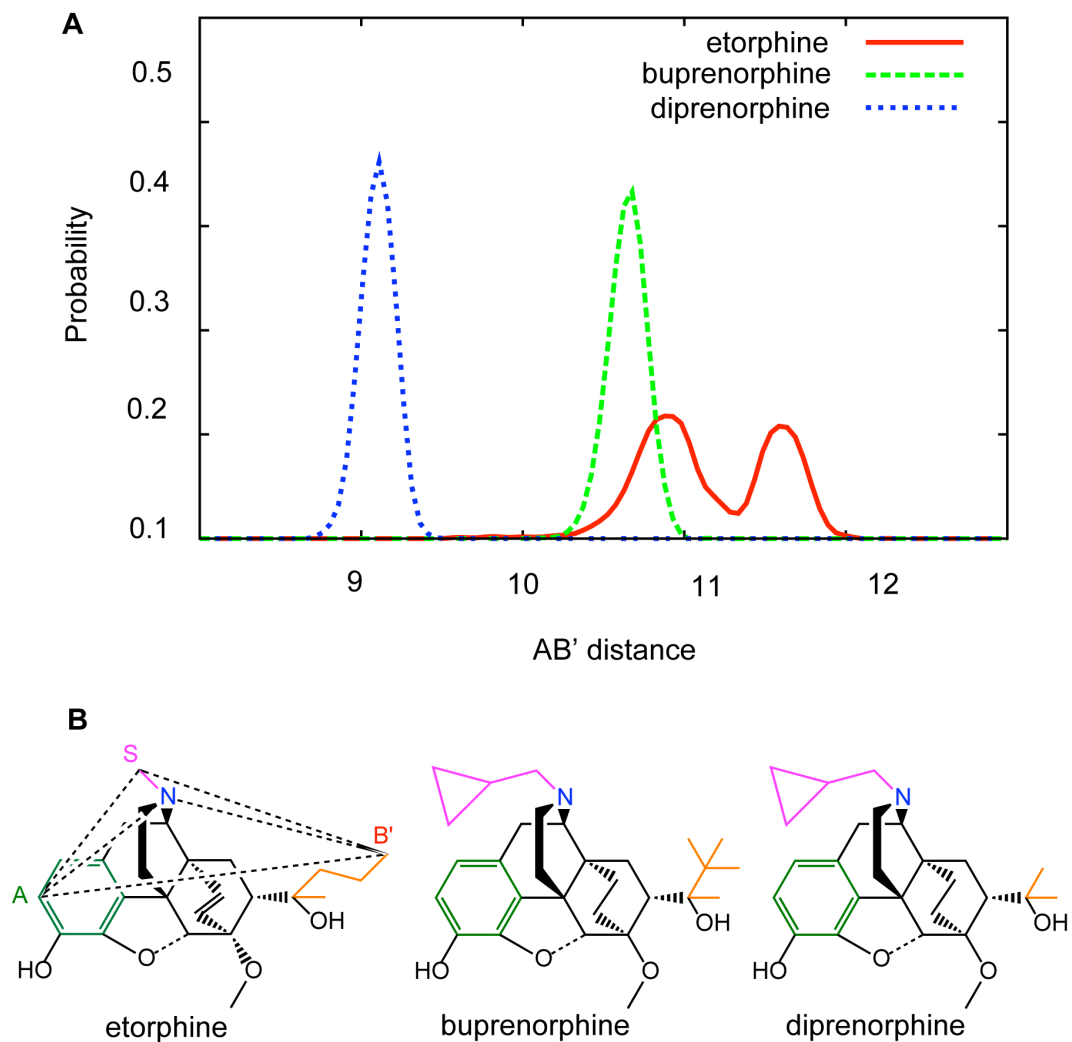

Figure 2. a) 1D probability distributions of AB' distance on etorphine, buprenorphine and diprenorphine using the alternate definition of the B group, designated B'. b) Pharmacophoric point definition for AB'NS models where the B' group is represented in orange.

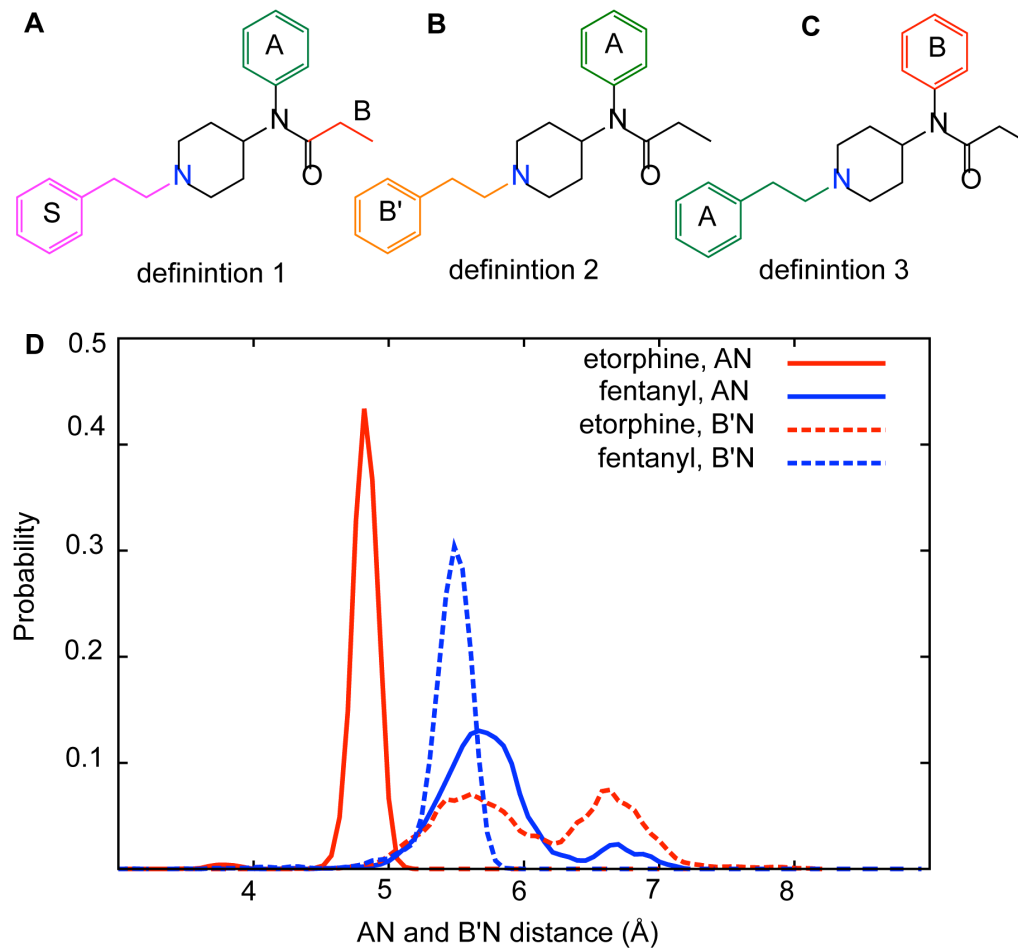

Figure 3. A) Conventional pharmacophore definitions used in ABNS models where phenethyl group is S point (N-substituent), the aromatic ring attached to the amide is A, and the propionyl group is B. B) Pharmacophore definitions used in AB'NS model where phenethyl group is alternative B' point. C) Third pharmacophore definition where A is the phenethyl group and B is the aromatic ring attached to the amide. In all cases N is the piperidine ring nitrogen and if not noted, S is the associated basic nitrogen. D) Probability distribution of the distance between the two aromatic rings and the N descriptor.

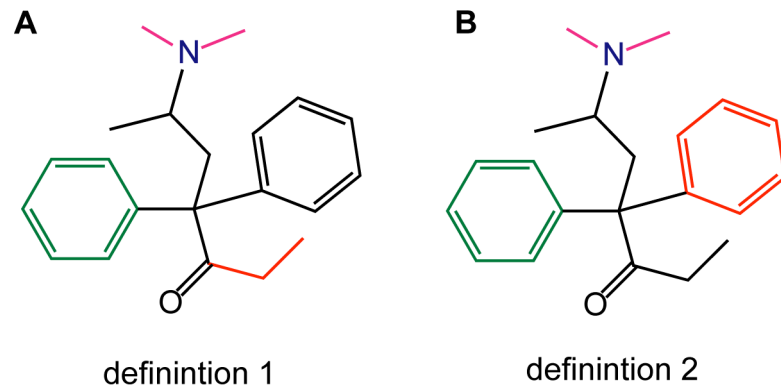

Figure 4. Pharmacophoric point definitions for methadone showing the A (green), B (red), N (blue), and S (pink) groups.

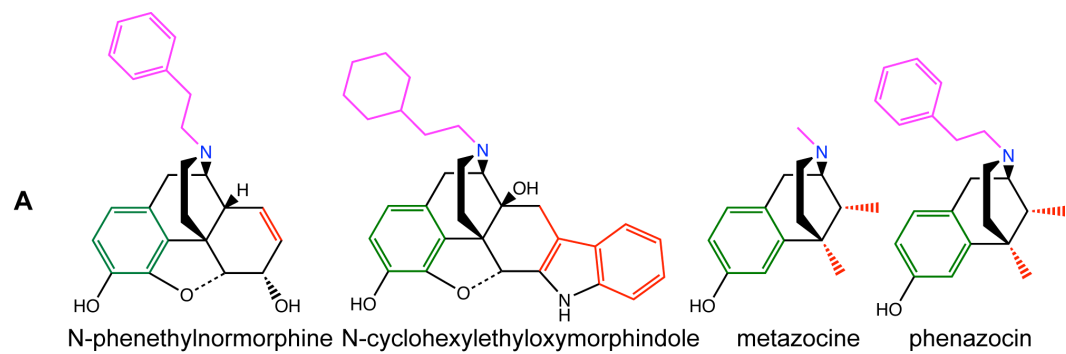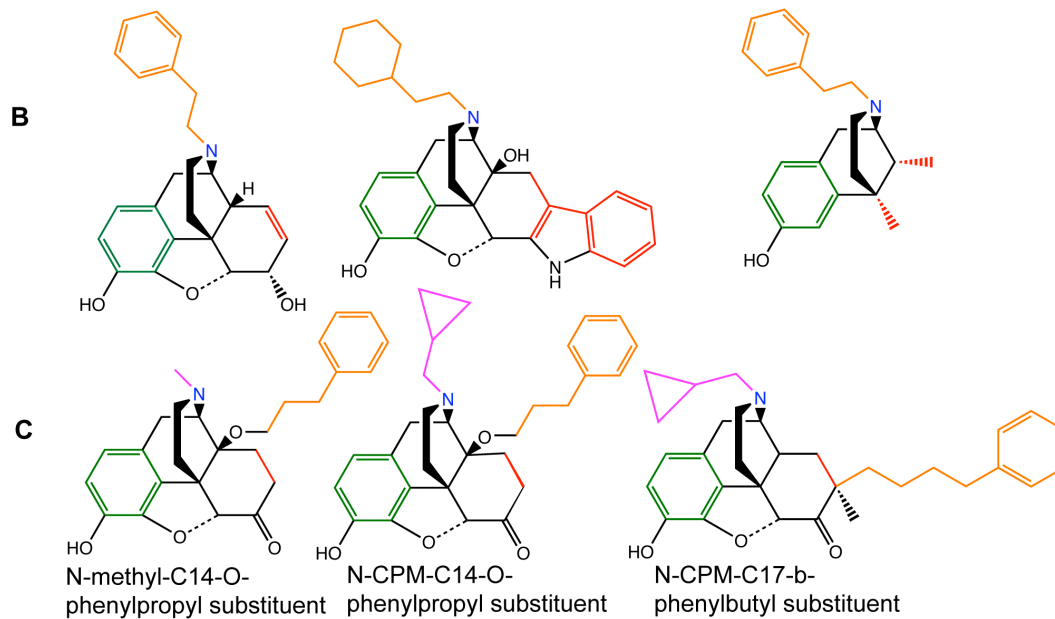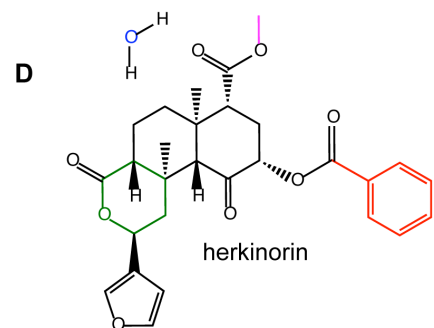

Figure 5. Test set 2 compounds and their pharmacophoric point definitions for the A) ABNS and B) AB'NS models. Compounds in c) show both definitions B (red) and B' (orange) used for ABNS and AB'NS models respectively. D) Pharmacophoric point definition for herkinorin was used only in AB'NS models.



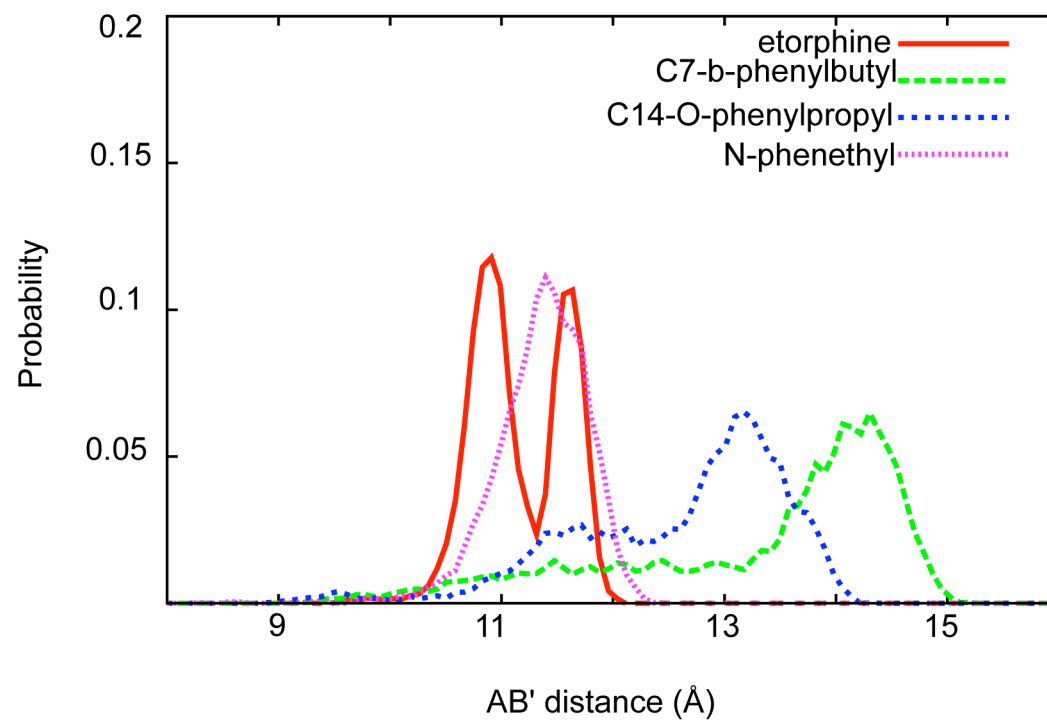

Figure 6. Probability distribution of AB' distance of etorphine, N-phenethylnormorphine, C7- $\beta$ -phenylbutylmorphinans and C14-O-phenylpropylmorphinan.

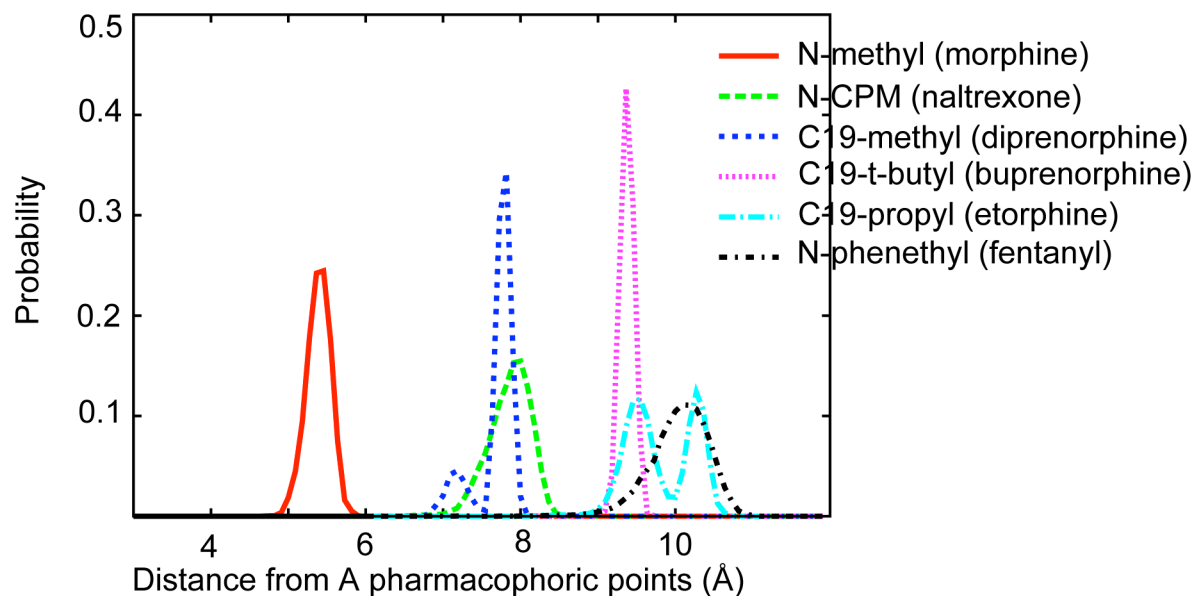

Figure 7. Distance distribution between the aromatic A ring and N-CPM of the antagonist naltrexone showing it to be similar to that between the A ring and C19-methyl substituent of the antagonist diprenorphin. In contrast the A to C19 substituent distance distributions in etorphine and buprenorphine are significantly longer, allowing for interactions with the B site. A similar distribution occurs with fentanyl. Distances are from the centroid of aromatic ring to the indicated groups.

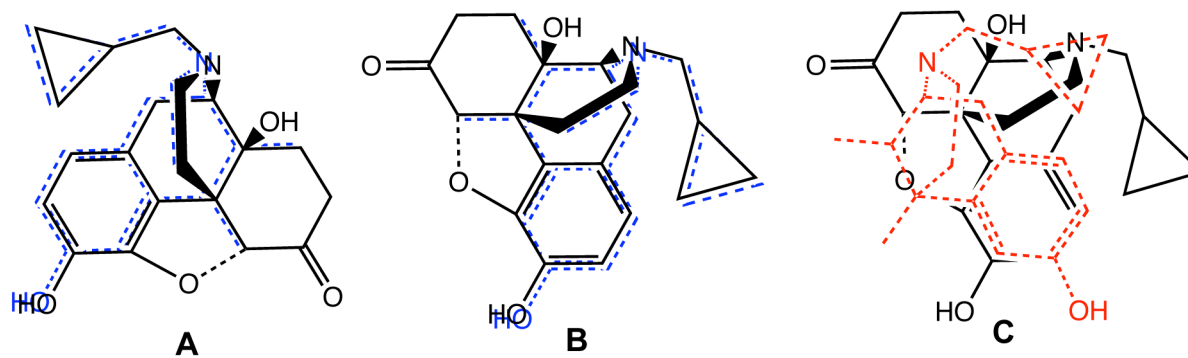

Figure 8. Reorientation of cyclazocine. Cyclazocine's structures are represented in dashed lines and overlaid on naltrexone. In b), structure a) is rotated around the axis connecting nitrogen and aromatic ring while c) shows cyclazocine in b) shifted towards the dihydrofuran ring of naltrexone illustrating the relative orientation in which cyclazocine assumes the binding orientation in Figure 5F.

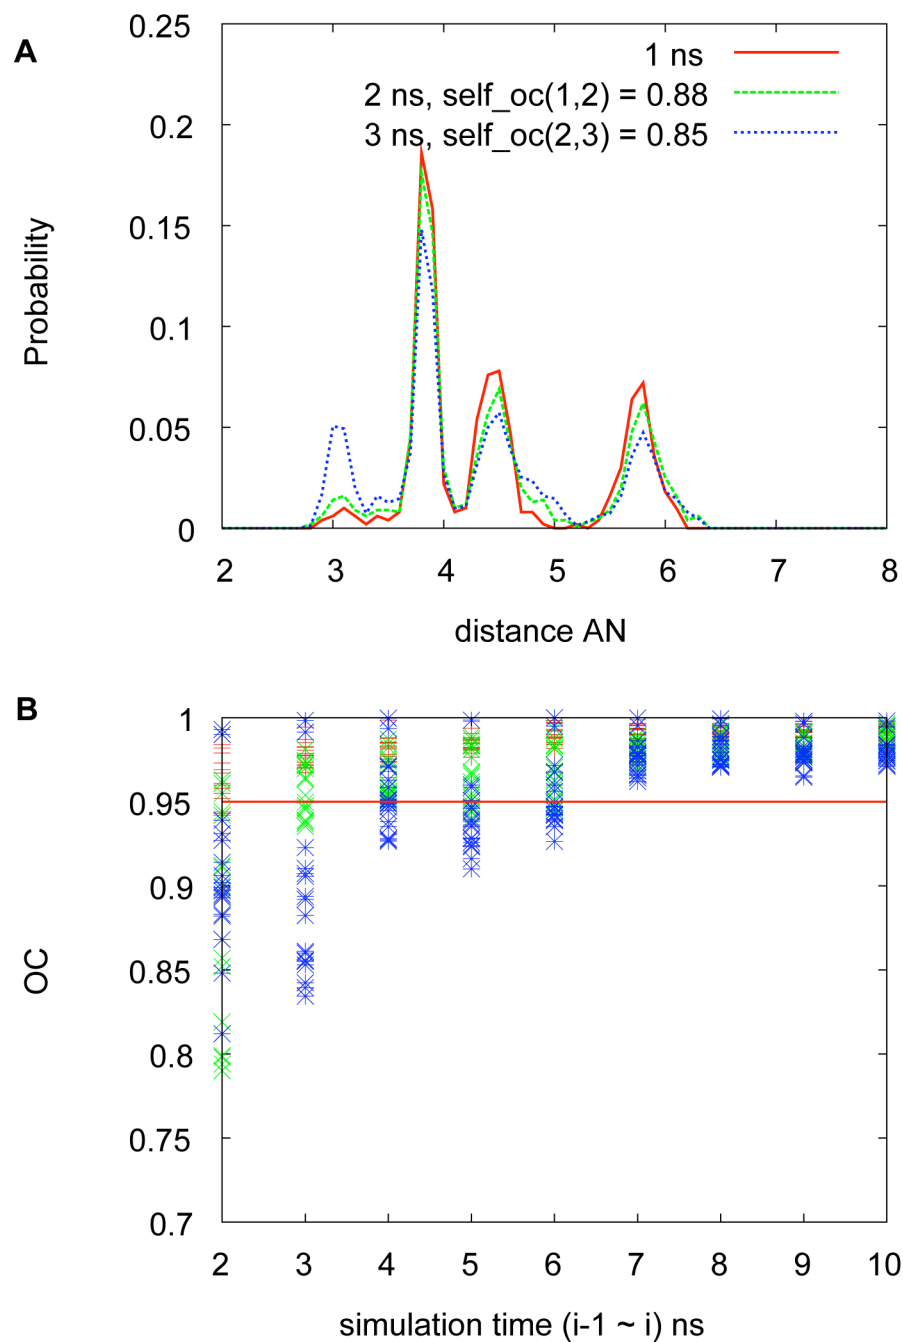

Figure 9. Convergence evaluation based on self OC values. a) Self OC values of the DAMGO AN probability distributions calculated between distributions at 1 and 2 ns (green line) and between 2 and 3 ns (blue line). In b) each point represents the self OC of a distance or angle parameter as a function of simulation time. Morphine's self OC values are shown in red, etonitazene in green, and

DAMGO in blue. Self OC values were calculated using equation S1 as a function of simulation time,

$$\text{self OC}(i, i + 1) = \sum_j \min(P_{i,j}^A, P_{i+1,j}^A)$$

$$\text{self OC} = \sum \min(P_i^A, P_i^{A+\Delta t}) \quad \text{Eq. S1}$$

where  $P_i^A$  is the probability distribution of distance or angle between pharmacophoric points, at bin  $i$  out to  $A$  ns. The eighteen distances and angles described above (Figure S8) were subjected to this analysis and convergence was defined based on the magnitude of the self OC values as a function of simulation time. As an example, Figure S9a shows probability distributions for the distance between the aromatic ring (A) and protonated nitrogen (N) of DAMGO at 1, 2 and 3 ns. Figure S9b shows the change in all self OC values as a function of time for three compounds of varying flexibility. Self OCs of the flexible compounds etonitazene and DAMGO grow slowly (Figure S9b), whereas rigid morphine reaches 95 % similarities at 3ns. In all cases the convergence of conformational space was greater than 95 % following 10 ns of simulation time. This level of convergence was deemed satisfactory for CSP model development.

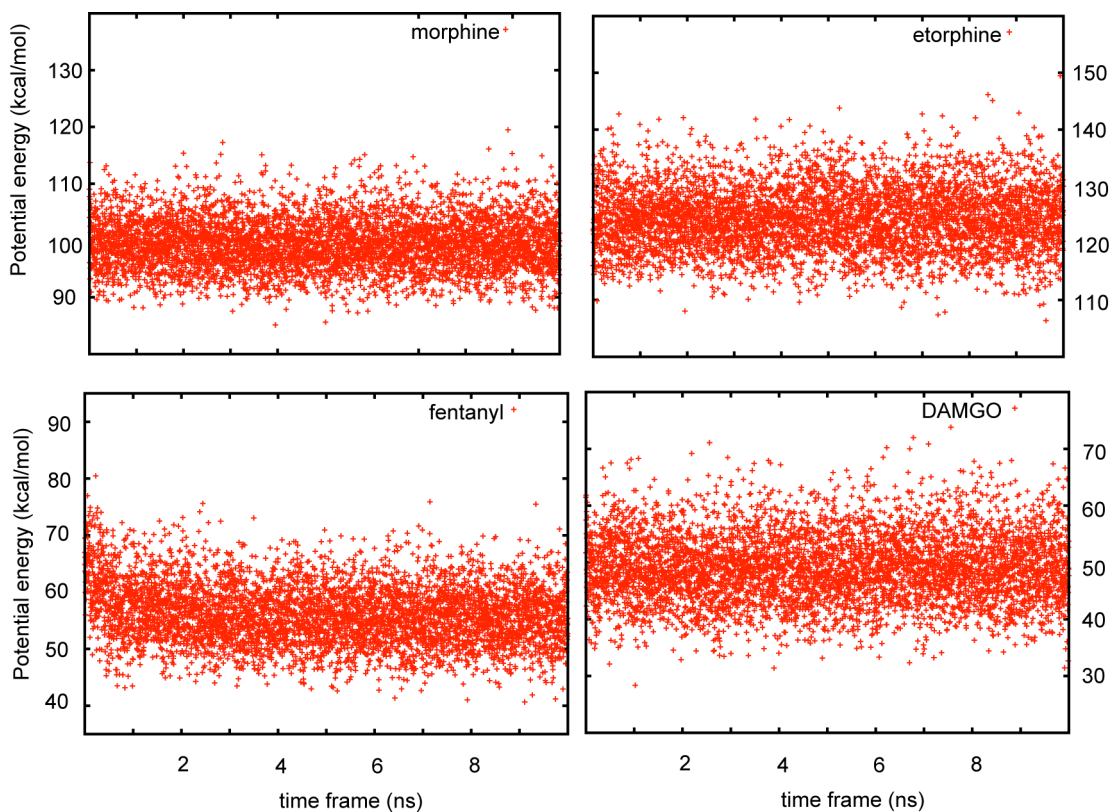

Figure 10. Potential energy as a function of time in the ground state replica. Results for four compounds, morphine, etorphine, fentanyl and DAMGO are shown. Notably, the use of temperature replica exchange MD in this study allowed for energy barriers of 30~40 kcal/mol to be overcome.

**CGenFF parameters for nonpeptidic opioids:** As internal parameters for many of the non-peptidic opioids were not explicitly treated in the CHARMM General Force Field (CGenFF) it was necessary to extend the force field to assure accurate modeling of these compounds. This was performed by analogy with the resulting parameters then validated based on calculations on morphine, cyclazocine, and etorphine. The resulting bond and angle parameters reproduced target geometries quite well, having root mean square differences (RMSD) within 0.02 Å and 2.3° with respect to QM data and 0.03 Å and 3.1° with respect to high resolution crystal structures for the bonds and angles, respectively (Table P1). In addition, CGenFF vibrational frequencies were compared with QM results for aminomethylcyclopropane and benzomorphan (see Tables P2 of the Supporting information). The overall agreement was considered acceptable and further optimization of the internal parameters was not undertaken. Further validation of the parameters was based on the crystal MD simulations. Results from the simulations showed that interactions in the condensed-phase crystal environments were well balanced, with similar changes occurring for the A, B and C lattice parameters. However, the force field appears to overpredict the unitcell volumes. A similar phenomenon has been observed with carbohydrate parameters<sup>10</sup> and has been suggested to be associated with limitations in the additive potential energy function. Accordingly, additional optimization of the force field parameters was not undertaken.

Vibrational frequencies, including potential energy distributions, were obtained at the MP2/6-31G\* level and examined using the CHARMM VIBRAN and MOLVIB modules<sup>11</sup>. QM vibrational frequencies were scaled by 0.971 to account for limitations in

the level of theory<sup>12</sup>. Final validation of the force field was performed with crystal simulations using the CRYSTAL module in the CHARMM program. Atomic coordinates of morphine, etorphine, and naltrexone (CSD ID: MORPHC, SUNVOM, PABCEA, respectively) were relaxed by minimization with the lattice parameters fixed. Nonbond interactions were truncated at 26 Å with smoothing from 24 Å of the Lennard-Jones interactions by a switching function while long-range electrostatic interactions were included using the particle mesh Ewald method<sup>13</sup>. The Velocity-Verlet 2 algorithm<sup>14</sup> was used to propagate the simulations with an integration timestep of 1 fs in conjunction with Nose-Hoover thermostat and Anderson-Hoover barostat. The crystal simulations were run for 7 ns with the last 5 ns used for analysis.

Table P1. Comparison of empirical and target bond and angles from the CGenFF minimized structures and from the crystal simulations.

|             | Geometry (RMSD) |       |      |       | Crystal simulation (%error) |     |     |        |
|-------------|-----------------|-------|------|-------|-----------------------------|-----|-----|--------|
|             | QM              |       | Xtal |       | Unitcell parameters         |     |     |        |
|             | Bond            | Angle | Bond | Angle | A                           | B   | C   | Volume |
| Cyclazocine | 0.02            | 2.01  |      |       |                             |     |     |        |
| Morphine    | 0.02            | 2.33  | 0.02 | 1.83  | 0.6                         | 0.6 | 0.6 | 1.7    |
| Etorphine   |                 |       | 0.03 | 2.62  | 5.5                         | 5.5 | 5.5 | 17.5   |
| Naltrexone  |                 |       | 0.02 | 2.38  | 2.4                         | 2.4 | 2.4 | 7.3    |

\* units: Å and degrees for bonds and angles, respectively,  $RMSD = \sqrt{\frac{\sum(x_{mm} - x_{qm \text{ or } xtal})^2}{N}}$ ,

$$\% \text{ error} = \frac{x_{mm} - x_{exp}}{x_{exp}} * 100$$



Table P2. Vibrational spectra of Aminomethyl cyclopropane and 1,2,3,4,5,6-hexahydro-3-methyl-2,6-Methano-3-benzazocin-8-ol. Frequencies in  $\text{cm}^{-1}$ .

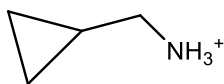

MP2/6-31G\* scaled by a factor 0.971

CGenFF

| Freq.  | Assignment | %   | Assignment | %  | Assignment | %  | Freq.  | Assignment | %  | Assignment | %  | Assignment | %  |
|--------|------------|-----|------------|----|------------|----|--------|------------|----|------------|----|------------|----|
| 123.4  | torC1-C9   | 100 |            |    |            |    | 92.6   | torC1-C9   | 99 |            |    |            |    |
| 212.1  | torC9-N1   | 58  | rC1C9a     | 26 |            |    | 178.6  | torC9-N1   | 94 |            |    |            |    |
| 231.4  | torC9-N1   | 32  | rC1C9a     | 32 | cC9X2      | 25 | 242.2  | rC1C9a     | 59 | cC9X2      | 34 |            |    |
| 367.5  | rC1C9      | 73  |            |    |            |    | 382.1  | cC9X2      | 28 | rC1C9a     | 24 | rC1C9      | 15 |
| 453.9  | cC9X2      | 40  | rC1C9a     | 31 |            |    | 444.7  | rC1C9      | 62 | cC9X2      | 17 |            |    |
| 785.6  | STRETCH    | 29  | tCrH2      | 23 | sC1-C9     | 16 | 690.5  | tCrH2      | 54 | sC1-C9     | 24 |            |    |
| 811.4  | rCrH2      | 37  | tCrH2      | 20 | rC9H2      | 20 | 757.8  | rC9H2      | 30 | wCrH2      | 29 | tCrH2      | 22 |
| 861.6  | rCrH2      | 32  | rC1Ha      | 22 | SLIDE      | 16 | 785.1  | tCrH2      | 45 | rC1Ha      | 43 |            |    |
| 865.4  | rC9H2      | 23  | rCrH2      | 22 | sC9-N12    | 17 | 802.0  | wCrH2      | 65 | rC9H2      | 18 |            |    |
| 910.0  | sC9-N12    | 55  | STRETCH    | 15 |            |    | 838.9  | tCrH2      | 46 | wCrH2      | 34 |            |    |
| 941.9  | SLIDE      | 62  |            |    |            |    | 864.6  | rN12H3a    | 19 | sC1-C9     | 17 | tCrH2      | 16 |
| 994.3  | STRETCH    | 31  | sC1-C9     | 20 | tCrH2      | 16 | 900.1  | wCrH2      | 47 | rC1Ha      | 38 |            |    |
| 1034.3 | rN12H3a    | 37  |            |    |            |    | 963.4  | rN12H3     | 41 | sC9-N12    | 32 |            |    |
| 1096.4 | wCrH2      | 95  |            |    |            |    | 984.6  | rN12H3     | 31 | rN12H3a    | 19 | sC9-N12    | 17 |
| 1121.9 | wCrH2      | 98  |            |    |            |    | 1006.0 | rN12H3a    | 35 | sC9-N12    | 31 |            |    |
| 1124.8 | rN12H3     | 24  |            |    |            |    | 1086.2 | rCrH2      | 38 | STRETCH    | 18 |            |    |
| 1158.6 | rC1Ha      | 59  | tCrH2      | 18 |            |    | 1106.7 | STRETCH    | 60 | rCrH2      | 18 |            |    |
| 1221.5 | tCrH2      | 48  | rCrH2      | 44 |            |    | 1111.7 | SLIDE      | 54 |            |    |            |    |
| 1247.0 | tCrH2      | 25  | rC9H2      | 15 |            |    | 1205.5 | rCrH2      | 99 |            |    |            |    |
| 1256.5 | PULSE      | 44  | rC1H       | 26 |            |    | 1253.3 | PULSE      | 56 |            |    |            |    |
| 1351.6 | tC9H2      | 61  |            |    |            |    | 1291.5 | tC9H2      | 72 |            |    |            |    |
| 1392.0 | wC9H2      | 62  | rC1H       | 15 |            |    | 1348.0 | wC9H2      | 56 | rC1H       | 23 |            |    |
| 1458.2 | rC1H       | 35  | wC9H2      | 23 |            |    | 1457.5 | dsN12H3    | 80 |            |    |            |    |

|        |          |     |         |    |        |          |     |          |    |
|--------|----------|-----|---------|----|--------|----------|-----|----------|----|
| 1503.3 | cCrH2    | 98  |         |    | 1463.4 | cCrH2    | 96  |          |    |
| 1527.5 | cC9H2    | 69  | dsN12H3 | 26 | 1471.2 | cCrH2    | 55  | rC1H     | 27 |
| 1533.6 | dsN12H3  | 70  | cC9H2   | 28 | 1486.6 | cC9H2    | 56  | dsN12H3  | 16 |
| 1547.8 | cCrH2    | 76  |         |    | 1513.9 | rC1H     | 37  | PULSE    | 21 |
| 1686.9 | daN12H3  | 89  |         |    | 1620.3 | daN12H3  | 74  | daN12H3a | 21 |
| 1697.7 | daN12H3a | 89  |         |    | 1624.1 | daN12H3a | 74  | daN12H3  | 21 |
| 3104.8 | ssC9H2   | 100 |         |    | 2773.4 | ssC9H2   | 99  |          |    |
| 3153.5 | ssCrH2   | 95  |         |    | 2805.0 | saC9H2   | 100 |          |    |
| 3168.7 | sC1-H1   | 48  | saC9H2  | 47 | 3029.4 | ssCrH2   | 96  |          |    |
| 3175.5 | ssCrH2   | 94  |         |    | 3039.4 | ssCrH2   | 99  |          |    |
| 3181.7 | saC9H2   | 50  | sC1-H1  | 49 | 3054.6 | sC1-H1   | 94  |          |    |
| 3253.3 | saCrH2   | 95  |         |    | 3087.9 | saCrH2   | 100 |          |    |
| 3271.3 | saCrH2   | 98  |         |    | 3102.0 | saCrH2   | 98  |          |    |
| 3360.8 | ssN12H3  | 100 |         |    | 3153.5 | ssN12H3  | 100 |          |    |
| 3472.1 | saN12H3  | 93  |         |    | 3256.6 | saN12H3a | 51  | saN12H3  | 49 |
| 3476.7 | saN12H3a | 93  |         |    | 3257.2 | saN12H3  | 51  | saN12H3a | 49 |

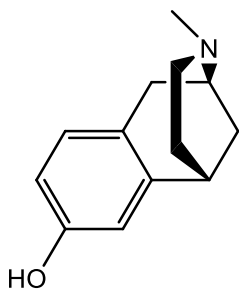

| MP2/6-31G* |            |    |            |    |            | CGenFF |       |            |    |            |    |            |    |
|------------|------------|----|------------|----|------------|--------|-------|------------|----|------------|----|------------|----|
| Freq.      | Assignment | %  | Assignment | %  | Assignment | %      | Freq. | Assignment | %  | Assignment | %  | Assignment | %  |
| 52.5       | torR2      | 55 | bfR1R2     | 20 |            |        | 52.2  | torR2      | 51 | bfR1R2     | 21 |            |    |
| 100.6      | torR2'     | 51 | torR1      | 43 |            |        | 105.5 | torR2'     | 59 | torR1      | 23 |            |    |
| 123.6      | torR3a     | 50 | bfR1R2     | 39 |            |        | 125.7 | torR3a     | 47 | bfR1R2     | 42 |            |    |
| 208.6      | torCH3     | 39 |            |    |            |        | 205.2 | wR1CO      | 22 |            |    |            |    |
| 228.8      | torCH3     | 43 |            |    |            |        | 242.0 | rR1CO      | 18 |            |    |            |    |
| 258.3      | torR3a'    | 38 |            |    |            |        | 295.0 | torCH3     | 21 | puckR2     | 17 |            |    |
| 289.6      | torR3a'    | 45 | dR3XCZ     | 16 |            |        | 298.3 | torR3a'    | 27 | dR2a       | 20 |            |    |
| 322.6      | puckR2     | 26 | puckR1     | 20 | puckR3     | 20     | 324.0 | dR3YCZ     | 47 | dR3XCZ     | 15 |            |    |
| 334.4      | torR1'     | 30 | torR2'     | 19 |            |        | 328.0 | torR1'     | 26 |            |    |            |    |
| 349.4      | dR3YCZ     | 45 |            |    |            |        | 340.2 | torCO      | 77 |            |    |            |    |
| 361.8      | torCO      | 48 |            |    |            |        | 357.4 | torCH3     | 54 |            |    |            |    |
| 363.0      | torCO      | 57 |            |    |            |        | 369.0 | torR3a'    | 52 | dR3a'      | 17 |            |    |
| 390.4      | puckR2     | 22 |            |    |            |        | 406.9 | puckR2     | 18 |            |    |            |    |
| 426.4      | rR1CO      | 29 | torR1'     | 18 |            |        | 413.7 | dR3XCZ     | 20 |            |    |            |    |
| 444.6      | torR1'     | 24 |            |    |            |        | 448.5 | rR1CO      | 20 |            |    |            |    |
| 470.2      |            |    |            |    |            |        | 453.9 | torR1'     | 30 | torR1      | 15 |            |    |
| 490.6      | dR2a'      | 19 | dR3a       | 18 |            |        | 471.4 | dR1a       | 18 |            |    |            |    |
| 511.7      | dR3a       | 16 |            |    |            |        | 512.4 | torR1      | 25 |            |    |            |    |
| 528.7      | wR1CO      | 73 | puckR1     | 26 |            |        | 534.3 | dR3a       | 22 | dR2        | 19 |            |    |
| 558.1      | dR2a'      | 17 |            |    |            |        | 550.1 | puckR3     | 21 | dR2a'      | 20 | sR3CN      | 15 |
| 600.9      | dR2a       | 25 | puckR2     | 16 |            |        | 616.8 | puckR1     | 15 |            |    |            |    |

|        |          |     |         |    |       |       |        |          |     |          |    |       |    |
|--------|----------|-----|---------|----|-------|-------|--------|----------|-----|----------|----|-------|----|
| 673.8  | dR3a'    | 16  |         |    |       | 649.4 | puckR1 | 61       |     |          |    |       |    |
| 708.3  | dR1      | 24  | sR2CC   | 17 | dR1a' | 15    | 670.6  | puckR1   | 21  |          |    |       |    |
| 725.0  | sR3CN    | 52  |         |    |       |       | 700.7  | sR3CN    | 28  |          |    |       |    |
| 755.4  | sR1CC    | 31  | sR2CC   | 24 |       |       | 736.3  | dR1a'    | 34  | sR1CC    | 23 |       |    |
| 765.4  | wR1CH    | 90  |         |    |       |       | 781.4  | rR3CH2'  | 38  |          |    |       |    |
| 813.3  | wR1CH    | 104 |         |    |       |       | 826.6  | wR1CH    | 38  | rR2CH2   | 34 |       |    |
| 821.8  | rR3CH2'  | 24  |         |    |       |       | 843.3  | sR3CC    | 27  | twR2CH2' | 18 |       |    |
| 852.4  | wR1CH    | 107 |         |    |       |       | 849.2  | wR1CH    | 60  |          |    |       |    |
| 863.0  | sR3CC    | 39  | sR2CC   | 20 |       |       | 882.5  | sR1CC    | 25  | twR2CH2' | 23 |       |    |
| 894.6  | sR2CC    | 48  |         |    |       |       | 899.5  | sR2CC    | 39  |          |    |       |    |
| 919.2  | rR2CH2   | 40  |         |    |       |       | 916.7  | wR1CH    | 102 |          |    |       |    |
| 937.7  | twR2CH2' | 20  | dR2     | 20 |       |       | 919.2  | twR2CH2' | 22  | rR3CH2   | 18 | sR1CC | 17 |
| 964.0  | sR2CC    | 29  | sR1CC   | 17 |       |       | 944.7  | sR2CC    | 18  | sR3CN    | 18 |       |    |
| 975.8  | sR1CC    | 17  |         |    |       |       | 980.0  | wR1CH    | 118 |          |    |       |    |
| 1016.7 | rR3CH2   | 23  | sR3CN   | 20 | sR2CC | 19    | 994.3  | rR3CH2   | 28  | sR3CC    | 25 |       |    |
| 1025.9 | sR3CN    | 21  | sR3CC   | 20 |       |       | 1030.2 | sR3CN    | 31  |          |    |       |    |
| 1053.6 | dR1      | 18  |         |    |       |       | 1050.3 | sR3CN    | 30  | sR2CC    | 21 |       |    |
| 1074.9 | sR3CC    | 24  | sR2CC   | 16 |       |       | 1074.1 | sR3CN    | 24  | sR3CC    | 16 |       |    |
| 1085.8 | sR3CN    | 27  |         |    |       |       | 1086.6 | sR1CC    | 16  |          |    |       |    |
| 1120.2 | sR3CC    | 19  | sR2CC   | 18 |       |       | 1112.1 | sR1CC    | 52  | rR1CH    | 16 |       |    |
| 1142.0 |          |     |         |    |       |       | 1112.2 | sR2CC    | 19  | sR3CN    | 15 |       |    |
| 1156.5 | rCH3     | 34  |         |    |       |       | 1126.1 | sR1CC    | 33  | sR2CC    | 17 |       |    |
| 1171.9 | rR1CH    | 27  |         |    |       |       | 1147.1 | sR2CC    | 25  |          |    |       |    |
| 1187.7 | rR1CH    | 30  |         |    |       |       | 1173.4 | twR3CH2' | 41  |          |    |       |    |
| 1197.7 | rR1CH    | 23  | rR2CH2' | 17 |       |       | 1184.7 | rCH3     | 38  | rCH3'    | 20 |       |    |
| 1216.5 | dCOH     | 54  | sR1CC   | 19 |       |       | 1200.2 | rR2CH2'  | 36  |          |    |       |    |
| 1221.8 |          |     |         |    |       |       | 1227.5 | sR1CC    | 22  |          |    |       |    |
| 1231.2 | sR2CC    | 19  |         |    |       |       | 1238.4 | twR2CH2  | 22  |          |    |       |    |
| 1268.4 | rR1CH    | 27  |         |    |       |       | 1250.9 | rR1CH    | 31  | sR1CC    | 29 |       |    |
| 1278.0 |          |     |         |    |       |       | 1282.9 | rR3CH    | 28  |          |    |       |    |
| 1292.3 | twR2CH2  | 34  |         |    |       |       | 1291.6 | sR1CC    | 27  | rR1CH    | 19 |       |    |
| 1320.3 | sR1OH    | 24  |         |    |       |       | 1294.4 | twR2CH2  | 31  |          |    |       |    |
| 1321.8 | rR2CHb'  | 26  |         |    |       |       | 1303.7 | sR3CC    | 18  |          |    |       |    |

|        |          |     |          |    |         |        |          |        |         |         |        |    |  |
|--------|----------|-----|----------|----|---------|--------|----------|--------|---------|---------|--------|----|--|
| 1355.1 |          |     |          |    |         | 1326.9 | wR3CH2'  | 47     |         |         |        |    |  |
| 1370.8 | rR2CH'   | 20  | wR3CH2'  | 18 |         | 1337.6 | twR3CH2  | 55     |         |         |        |    |  |
| 1378.6 | wR2CH2'  | 17  | twR3CH2  | 15 |         | 1360.1 | wR2CH2'  | 62     | sR2CC   | 15      |        |    |  |
| 1387.3 | rR2CH    | 19  | wR2CH2   | 17 |         | 1374.2 | sR2CC    | 20     |         |         |        |    |  |
| 1403.3 | wR3CH2   | 20  | wR2CH2   | 18 | wR2CH2' | 16     | 1393.8   | rR1CH  | 26      |         |        |    |  |
| 1405.6 | rR2CH'   | 31  |          |    |         | 1406.8 | wR3CH2   | 45     |         |         |        |    |  |
| 1414.9 | wR3CH2'  | 22  |          |    |         | 1415.5 | scR2CXY  | 30     | rR1CH   | 19      |        |    |  |
| 1443.7 | rR3CH    | 51  | wR3CH2   | 19 |         | 1424.7 | dCH3     | 52     |         |         |        |    |  |
| 1457.1 | rR3CH'   | 40  |          |    |         | 1429.1 | sR1CC    | 42     |         |         |        |    |  |
| 1470.0 | sR1CC    | 72  |          |    |         | 1444.5 | scR3CXY' | 58     |         |         |        |    |  |
| 1482.6 | dCH3     | 74  |          |    |         | 1445.8 | dCH3     | 17     |         |         |        |    |  |
| 1497.9 | sR1CC    | 45  | rR1CH    | 19 |         | 1447.6 | scR3CXY' | 27     | rR1CH   | 15      |        |    |  |
| 1509.6 | scR2CXY  | 51  | scR2CXY' | 21 |         | 1458.9 | scR2CXY' | 79     |         |         |        |    |  |
| 1515.3 | scR3CXY' | 58  |          |    |         | 1470.8 | rR1CH    | 28     | scR2CXY | 26      | sR1CC  | 18 |  |
| 1524.4 | dCH3a'   | 50  | scR3CXY  | 26 |         | 1479.3 | rR2CH'   | 23     | dCH3a   | 22      | rR3CH' | 17 |  |
| 1528.0 | scR3CXY  | 41  | scR2CXY' | 21 | dCH3a'  | 19     | 1492.1   | dCH3a' | 50      |         |        |    |  |
| 1529.8 | scR2CXY' | 41  | scR3CXY' | 21 | dCH3a'  | 15     | 1493.0   | sR1CC  | 17      | scR3CXY | 16     |    |  |
| 1542.4 | dCH3a    | 48  | scR3CXY  | 19 |         | 1503.8 | scR3CXY  | 52     |         |         |        |    |  |
| 1545.0 | sR1CC    | 37  | rR1CH    | 34 |         | 1517.9 | sR1CC    | 22     | dCH3a   | 19      |        |    |  |
| 1633.6 | sR1CC    | 72  |          |    |         | 1531.1 | dCH3a    | 23     |         |         |        |    |  |
| 1672.1 | sR1CC    | 65  | rR1CH    | 15 |         | 1552.7 | sR1CC    | 31     | rR1CH   | 26      |        |    |  |
| 3042.7 | sR2CH2'  | 67  | sR3CH2'  | 19 |         | 2819.7 | sR3CH2   | 99     |         |         |        |    |  |
| 3044.6 | sR2CH2   | 90  |          |    |         | 2848.0 | sR3CH2a  | 100    |         |         |        |    |  |
| 3046.1 | sR3CH2'  | 67  | sR2CH2'  | 18 |         | 2855.9 | sR2CH2   | 98     |         |         |        |    |  |
| 3078.4 | sR2CH'   | 94  |          |    |         | 2889.9 | sR2CH2a  | 98     |         |         |        |    |  |
| 3079.1 | sR2CH    | 92  |          |    |         | 2903.7 | sR3CH2'  | 94     |         |         |        |    |  |
| 3091.1 | sR2CH2a  | 74  | sCH3     | 17 |         | 2905.5 | sR2CH2'  | 93     |         |         |        |    |  |
| 3094.4 | sR3CH2   | 89  |          |    |         | 2908.3 | sR2CH'   | 98     |         |         |        |    |  |
| 3099.8 | sCH3     | 79  |          |    |         | 2916.7 | sCH3     | 99     |         |         |        |    |  |
| 3115.2 | sR2CH2a' | 86  |          |    |         | 2932.3 | sR3CH2a' | 89     |         |         |        |    |  |
| 3118.3 | sR3CH2a' | 86  |          |    |         | 2935.4 | sR2CH2a' | 89     |         |         |        |    |  |
| 3162.9 | sR1CH    | 100 |          |    |         | 2970.0 | sR2CH    | 100    |         |         |        |    |  |
| 3164.8 | sR3CH2a  | 96  |          |    |         | 2987.3 | sCH3a    | 87     |         |         |        |    |  |

|        |        |     |        |    |        |        |     |       |    |
|--------|--------|-----|--------|----|--------|--------|-----|-------|----|
| 3180.4 | sR1CH  | 61  | sR1CO  | 38 | 2990.0 | sCH3a' | 87  |       |    |
| 3180.7 | sR1CO  | 61  | sR1CH  | 38 | 3054.8 | sR1CH  | 79  | sR1CO | 21 |
| 3203.1 | sCH3a  | 82  | sCH3a' | 18 | 3055.7 | sR1CH  | 88  |       |    |
| 3223.5 | sCH3a' | 81  | sCH3a  | 18 | 3058.9 | sR1CO  | 67  | sR1CH | 33 |
| 3365.2 | sR3NH  | 100 |        |    | 3317.3 | sR3NH  | 100 |       |    |
| 3691.5 | sR1CH  | 100 |        |    | 3683.3 | sR1CH  | 100 |       |    |

## References

- Small, L.; Eddy, N.; Ager, J.; May, E. *J. Org. Chem.* **1958**, *23*, 1387-1388.
- Duttaroy, A.; Yoburn, B. C. *Anesthesiology* **1995**, *82*, 1226-1236.
- Cowan, A.; Lewis, J. W.; Macfarlane, I. R. *Br. J. Pharmacol.* **1977**, *60*, 537-545.
- McLamore, S.; Ullrich, T.; Rothman, R. B.; Xu, H.; Dersch, C.; Coop, A.; Davis, P.; Porreca, F.; Jacobson, A. E.; Rice, K. C. *J. Med. Chem.* **2001**, *44*, 1471-1474.
- Loew, G. H.; Toll, L.; Uyeno, E.; Cheng, A.; Judd, A.; Lawson, J.; Keys, C.; Amsterdam, P.; Polgar, W. *NIDA Res. Mono.* **1986**, *69*, 231-265.
- Rance, M. J. *Br. J. Clin. Pharmacol.* **1979**, *7*, 281S-286S.
- Eddy, N. B. *J. Chronic. Dis.* **1956**, *4*, 59-71.
- Wentland, M. P.; Lou, R.; Lu, Q.; Bu, Y.; VanAlstine, M. A.; Cohen, D. J.; Bidlack, J. M. *Bioorg. Med. Chem. Lett.* **2009**, *19*, 203-208.
- Uwaydah, I. M.; Waddle, M. K.; Rogers, M. E. *J. Med. Chem.* **1979**, *22*, 889-890.
- Guvench, O.; Greene, S. N.; Kamath, G.; Brady, J. W.; Venable, R. M.; Pastor, R. W.; MacKerell Jr., A. D. *J. Comput. Chem.* **2008**, *29*, 2543-2564.
- Kuczera, K. W., J. K.; Karplus, M. *MOLVIB: Program for the Analysis of Molecular Vibrations; CHARMM*. Harvard University: Boston, MA, 1993.
- Scott, A. P.; Radom, L. *J. Phys. Chem.* **1996**, *100*, 16502-16513.
- Darden, T.; York, D.; Pedersen, L. *J. Chem. Phys.* **1993**, *98*, 10089-10092.
- Lamoureux, G.; Roux, B. *J. Chem. Phys.* **2003**, *119*, 3025-3039.
